# Supplementary material for: Investigation of solution-based synthesis of non-toxic perovskite materials using Mg, Ca, Mn, Fe, Cu, and Zn as the B-site cation for photovoltaic applications
Source: Royal Society of Chemistry journal article supplement (doi:10.1039/d2tc02582e), 2022-01-01
Supplement: d2tc02582e1.pdf [file d2tc02582e1.pdf]

# Supplementary Information for Investigation of Solution-based synthesis of Non-Toxic Perovskite Materials using Mg, Ca, Mn, Fe, Cu, and Zn as the B-site cation for Photovoltaic Applications

S.R. Pering<sup>1\*</sup>, H. Gillions<sup>1</sup>, T. Kuznetsov<sup>1</sup>, W. Zhang<sup>1</sup>, K. Yendall<sup>2</sup> & M. Togay<sup>3</sup>

<sup>1</sup>Department of Materials, Loughborough University, Loughborough, LE11 3TU, UK

<sup>2</sup>Loughborough Materials Characterisation Centre, Loughborough University, Loughborough, LE11 3TU, UK

<sup>3</sup>Centre for Renewable Energy Systems Technology, Loughborough University, Loughborough, LE11 3TU, UK

## EXPERIMENTAL:

### *Powder Synthesis:*

1 molar solutions of each mixture were produced by dissolving a 1:1 ratio of AX and BX<sub>2</sub> salts in a 7:3 ratio of GBL and DMSO. 2 mL of solution was cast into a glass petri dish at 100 °C to anneal for one hour and form powder. Powders were stored in a sealed vial (in air) until analysis.

**Table 1.** Materials used in the experimental screening. Mass refers to the mass of salt used for 1 mL of solution

| AX salt                | Supplier   | Mass (mg) | BX <sub>2</sub> salt | Supplier   | Mass (mg) |
|------------------------|------------|-----------|----------------------|------------|-----------|
| Methylammonium iodide  | Merck      | 159       | Magnesium Iodide     | Merck      | 278       |
| Methylammonium bromide | Merck      | 112       | Magnesium Bromide    | Merck      | 184       |
| Potassium iodide       | Alfa Aesar | 166       | Calcium Iodide       | Merck      | 294       |
| Potassium bromide      | Alfa Aesar | 119       | Manganese bromide    | Merck      | 215       |
| Rubidium iodide        | Alfa Aesar | 165       | Iron bromide         | Merck      | 216       |
| Rubidium bromide       | Alfa Aesar | 212       | Iron iodide          | Merck      | 310       |
|                        |            |           | Copper bromide       | Alfa Aesar | 223       |
|                        |            |           | Zinc iodide          | Merck      | 320       |

Solutions were then diluted to 1 mmol for attempted single crystal synthesis through solvent evaporation. No successful crystals were produced during this work.

### *Thin-Film Synthesis:*

For thin-film synthesis, solutions were made in the same way as for powder preparation. 100 µL of solution were cast onto cleaned glass slides, and spin-coated at 2000 rpm for 20 seconds. Films were annealed at 100 °C for 1 hour. Films were stored in air until analysis.

### *Solar Cell Synthesis:*

FTO was etched to the desired pattern using Zn powder (Merck) and 2M HCl (Merck). Substrates were cleaned under sonication at 60 °C using deionised water, acetone, and isopropanol. 35 µL of filtered PEDOT:PSS (Ossila) was spin-coated at 6000 rpm for 40

seconds and heated to 100 °C. 100 µL of perovskite solution was deposited at 2000 rpm for 20 seconds, then annealed at 100 °C for 1 hour. A 20 mgml<sup>-1</sup> solution of PC<sub>71</sub>BM (Ossila) was deposited at 3000 rpm for 30 seconds.

A silver (Alfa Aesar) contact was added by metal evaporation.

#### *XRD:*

X-ray diffraction patterns were obtained using a Bruker D2 Phaser X-ray diffractometer, fitted with a 1-dimensional Lynxeye detector and a copper X-ray source ( $K_{\alpha} = 1.54184\text{\AA}$ ) operated at 30 kV and 10mA.  $K_{\beta}$  radiation was suppressed by means of a 0.5mm thick nickel filter. Patterns were recorded over a range of 5 – 50° (2 $\theta$ ) with a step size of 0.02° and an equivalent time of 96 seconds per step. Sample rotation was set at 15 rpm.

#### *Microscopy:*

Scanning electron microscopy was carried out on a JEOL JSM-7100F Field Emission Scanning Electron Microscope (FE-SEM). Samples were sputter coated with gold/palladium to provide a 5 to 10nm conductive layer to facilitate analysis. Images were collected using an accelerating voltage of 5kV and an approximate beam current of 120pA. Energy-dispersive X-ray spectroscopy (EDS) used an Oxford Instruments X-max 80mm<sup>2</sup> detector, combined with AzTec software, allowing elemental analysis to be carried out. Microscope parameters for EDS were changed to an accelerating voltage of 20kV and beam current of approximately 1nA.

#### *UV/Vis:*

Thin-film UV/Vis analysis was performed on a Cary5000 UV/Vis/NIR spectrometer. The measurements were taken in %Reflectance mode between 800 nm and 350 nm using an integrating sphere attachment. The Kubelka-Munk function was used to obtain band gap information from reflectance data.

#### *PV Characterisation:*

The J-V characteristics were measured using an ABET solar simulator in the dark and under illumination with Class A AM1.5G spectral match, calibrated using a reference Si photodiode. Measurements were taken at 0.7 Sun. Simulator uses a xenon arc lamp, and all the measurements were performed at room temperature.

## Supplementary Data:

### STAGE 1:

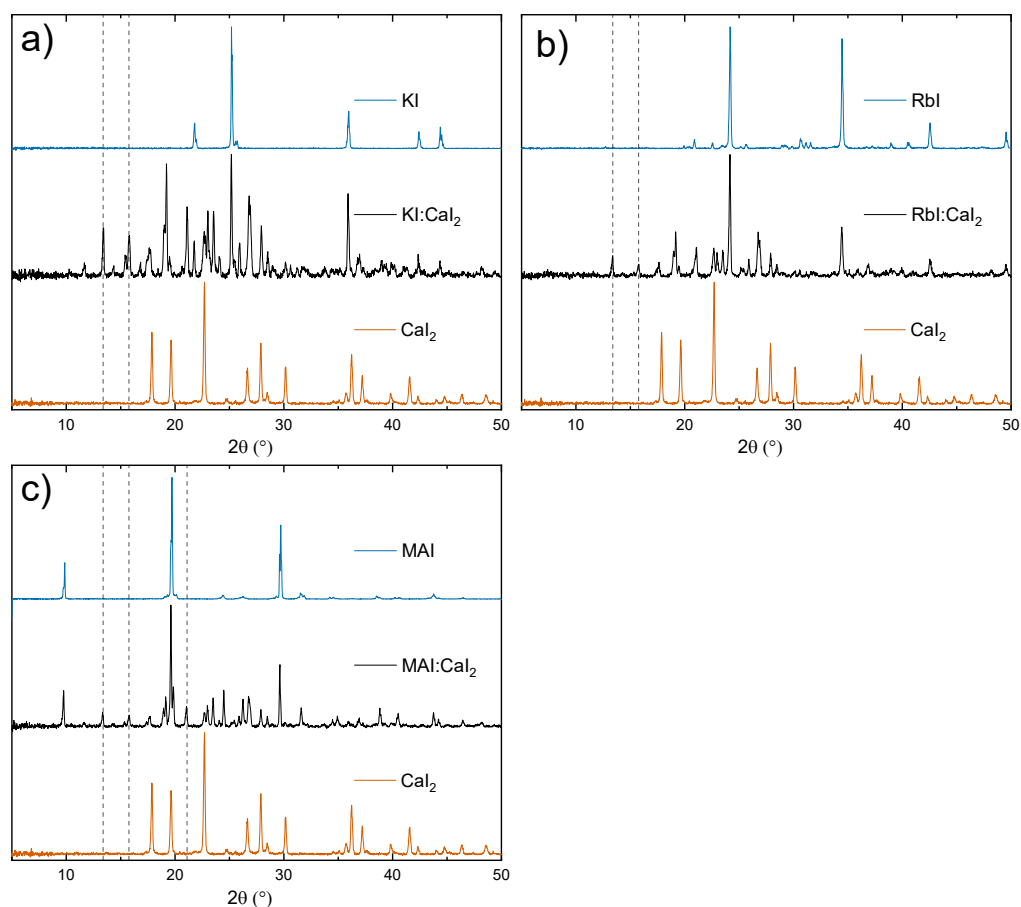

**Figure S1.** Normalised PXRD patterns for materials using calcium as the B-site cation and a) potassium, b) rubidium and c) methylammonium as the A-site cation. Dashed lines show major peaks un-matched to starting materials.

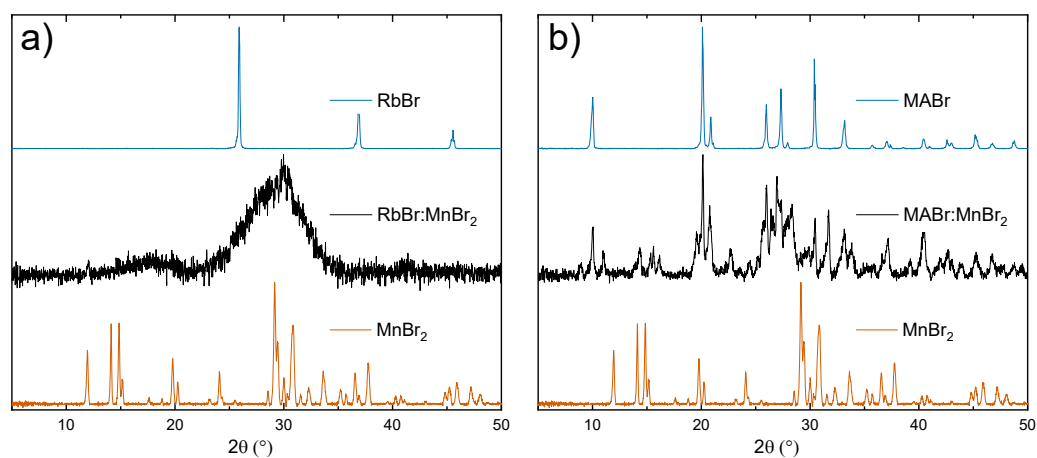

**Figure S2.** Normalised PXRD patterns for materials using manganese as the B-site cation and a) potassium and b) methylammonium as the A-site cation. Dashed lines show major peaks un-matched to starting materials. (Using K<sup>+</sup> as a cation did not produce a viable powder)

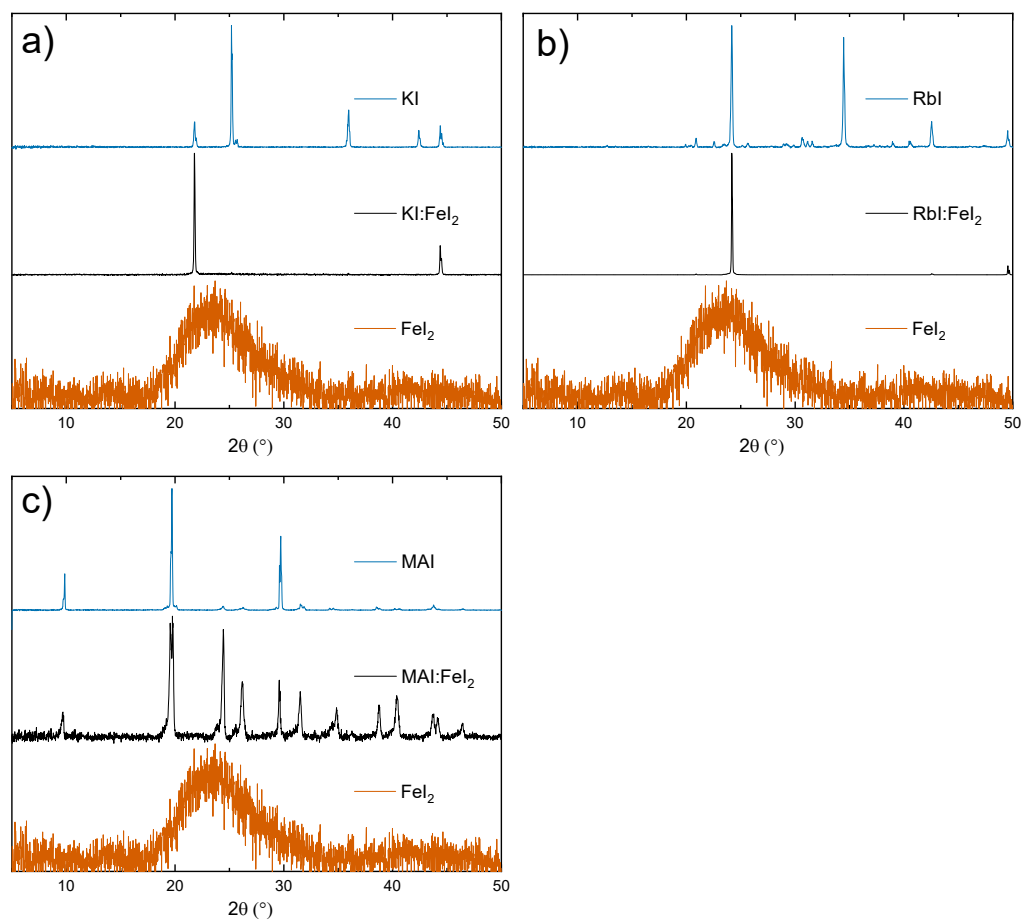

**Figure S3.** PXRD patterns for materials using iron as the B-site cation, iodide as the X-site anion and a) potassium, b) rubidium and c) methylammonium as the A-site cation. Dashed lines show major peaks un-matched to starting materials.

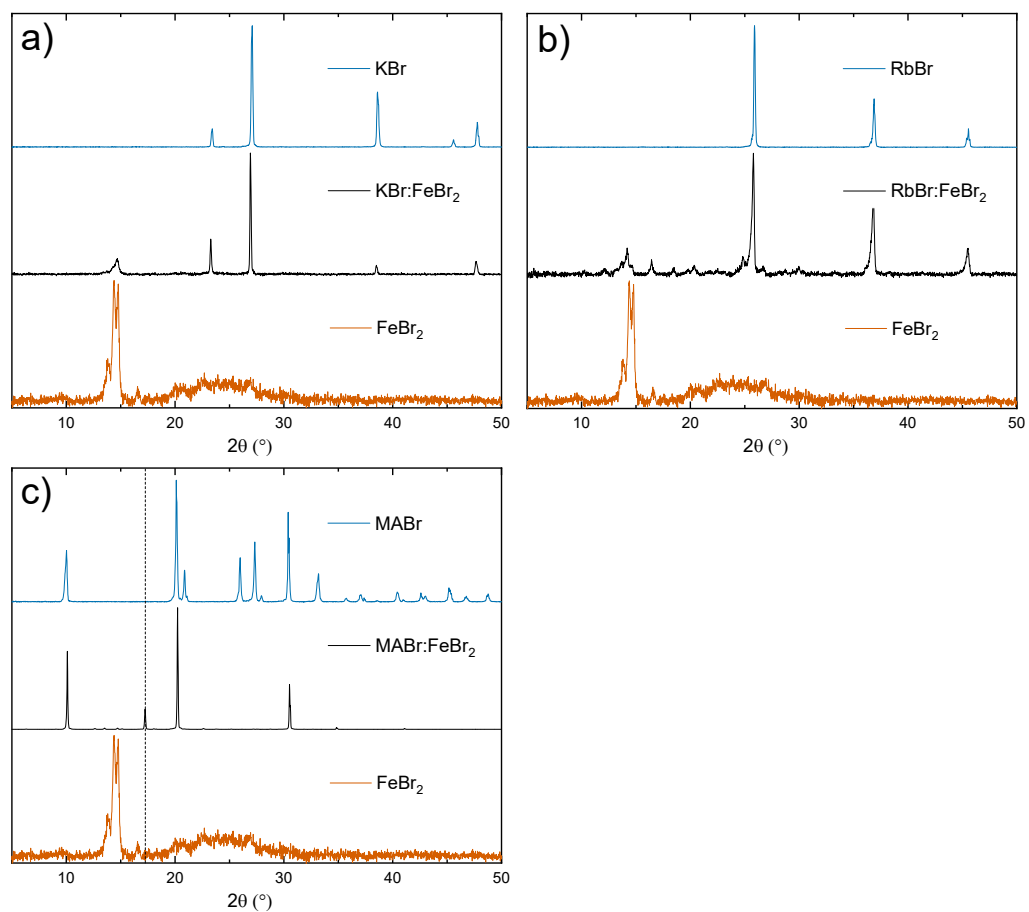

**Figure S4.** Normalised PXRD patterns for materials using iron as the B-site cation, bromide as the X-site anion and *a)* potassium, *b)* rubidium and *c)* methylammonium as the A-site cation. Dashed lines show major peaks un-matched to starting materials.

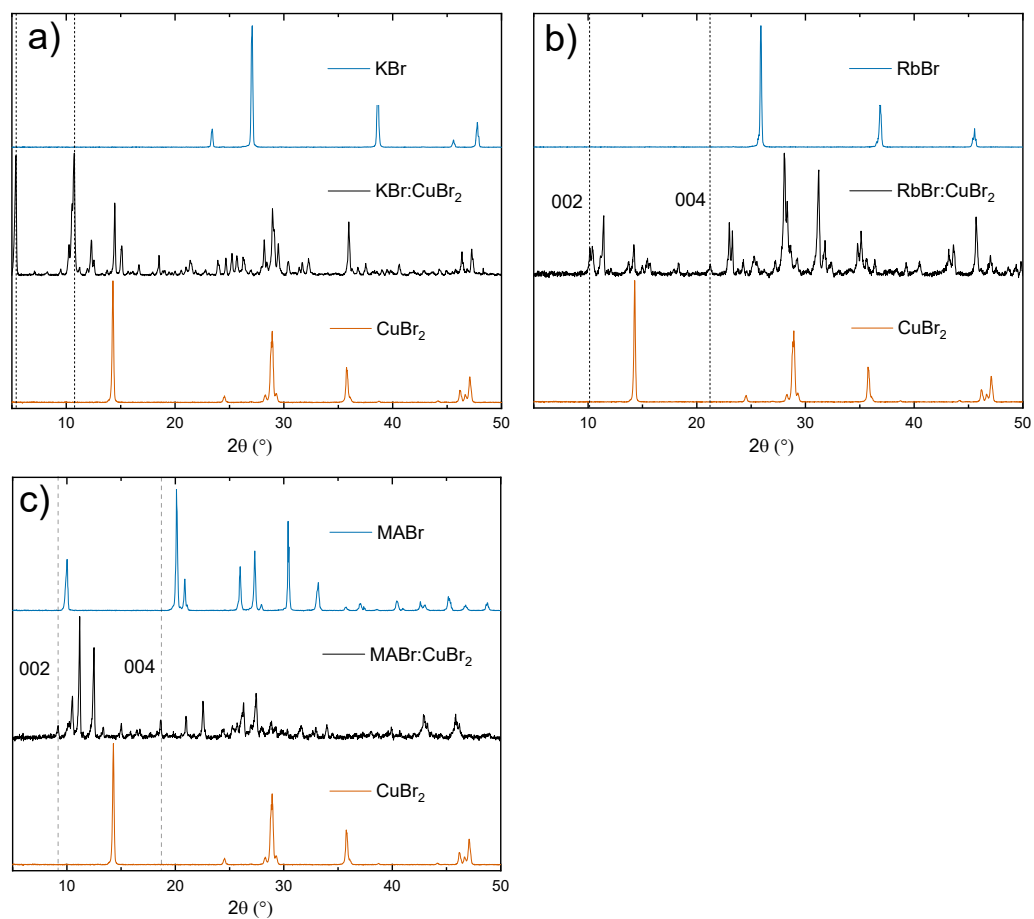

**Figure S5.** Normalised PXRD patterns for materials using copper as the B-site cation and a) potassium, b) rubidium and c) methylammonium as the A-site cation. Dashed lines show major peaks un-matched to starting materials. Reflections have been taken from reference<sup>1</sup>. CsCuX<sub>n</sub> peaks used for the rubidium containing compound.

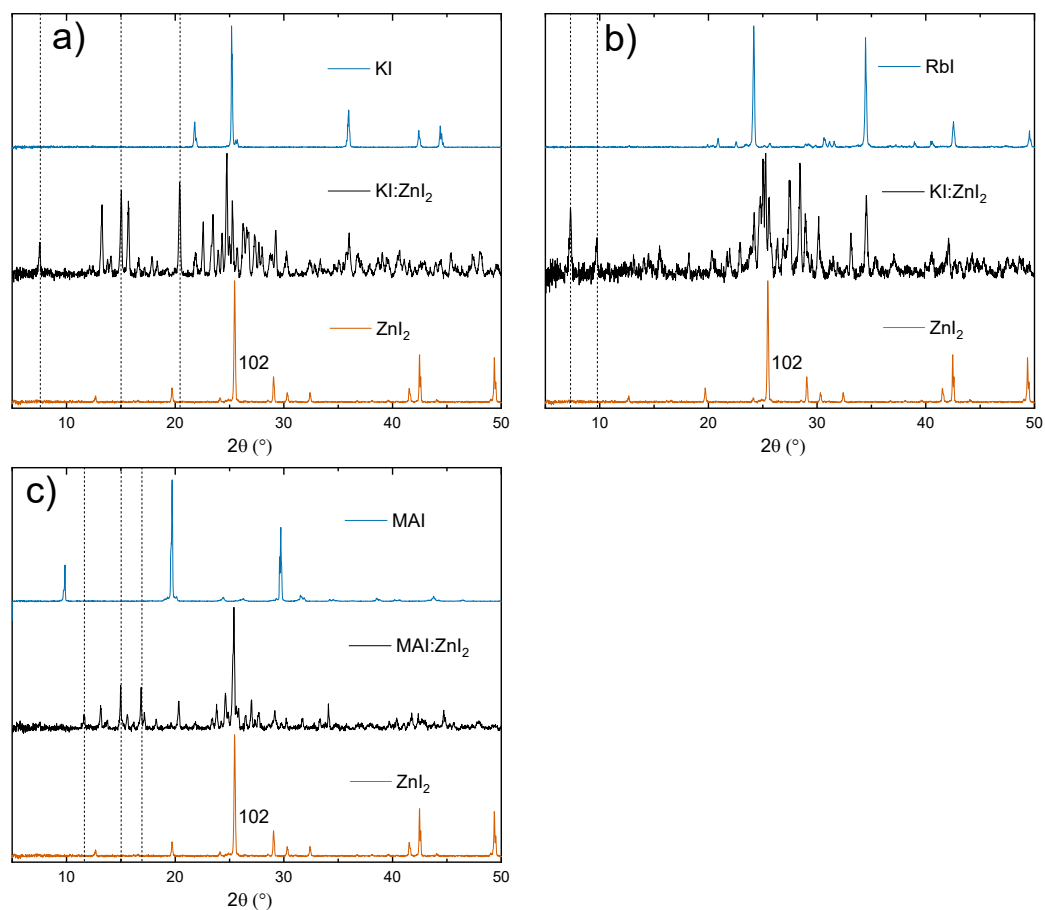

**Figure S6.** Normalised PXRD patterns for materials using zinc as the B-site cation and a) potassium, b) rubidium and c) methylammonium as the A-site cation. Dashed lines show major peaks un-matched to starting materials. Data for  $\text{ZnI}_2$  102 reflection taken from reference<sup>2</sup>.

STAGE 2:

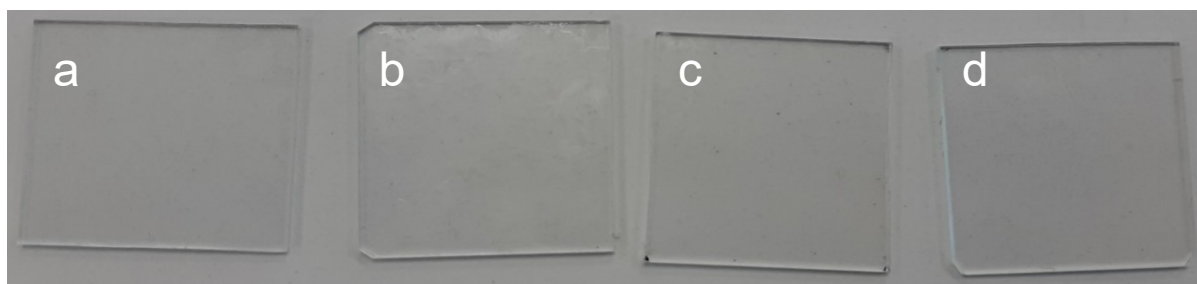

**Figure S7.** Images of  $\text{CaI}_2$  based thin films containing, a) blank microscope slide, b) K, c) Rb and d) MA as the A-site cation.

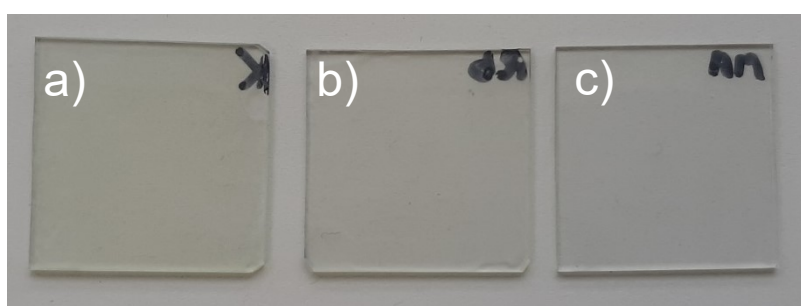

**Figure S8.** Images of  $\text{CuBr}_2$  based thin films containing, a) K, b) Rb and c) MA as the A-site cation.

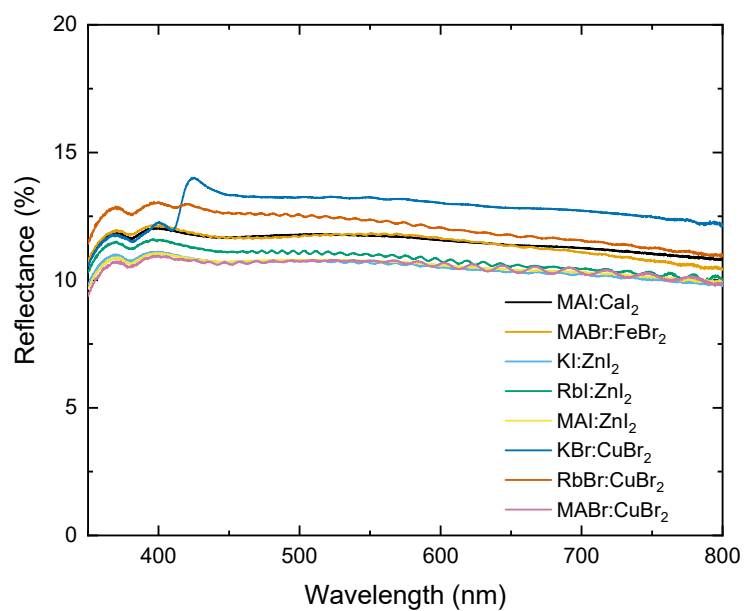

**Figure S9.** UV/Vis Reflectance for thin-film materials in stage 2 analysis



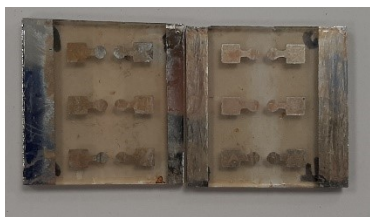

**Figure S10.** Photograph of devices using  $\text{KBr}:\text{CuBr}_2$  as the potential absorber material.

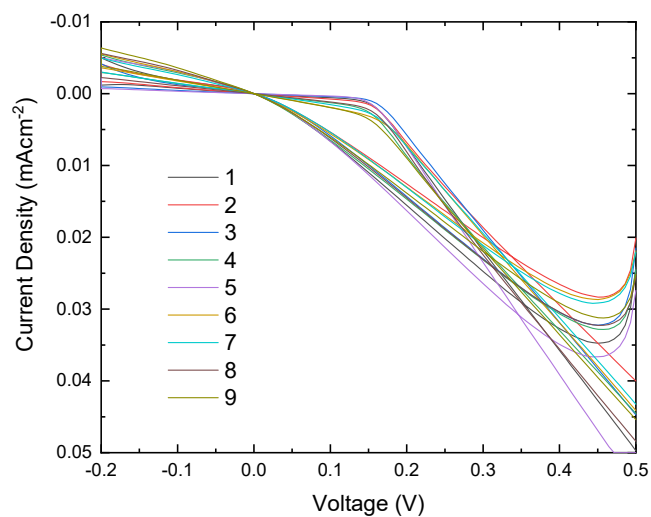

**Figure S11.** JV curves for samples that showed a suitable response (3/12 only showed resistor behaviour). The number in the legend refers to a different pixel on the device.

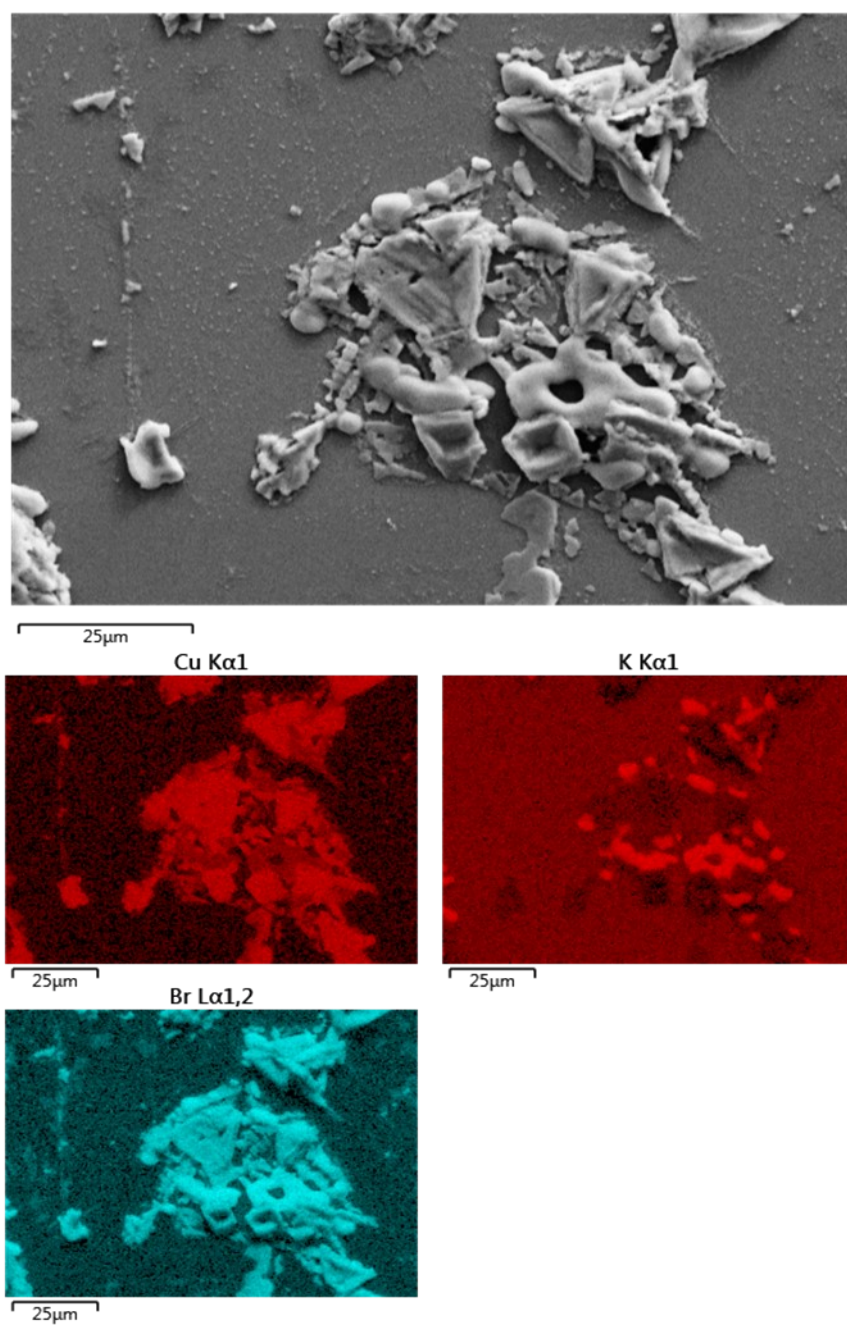

**Figure S12.** SEM/EDS analysis of KBr:CuBr<sub>2</sub>

1. D. Cortecchia, H. A. Dewi, J. Yin, A. Bruno, S. Chen, T. Baikie, P. P. Boix, M. Grätzel, S. Mhaisalkar, C. Soci, and N. Mathews, *Inorg. Chem.*, 2016, **55**, 1044–1052.
2. P. Tyagi and A. G. Vedeshwar, *Phys. Rev. B*, 2001, **64**, 245406.
